# Supplementary material for: The Epidemiology of Plasmodium falciparum Malaria in the Bijagos Islands of Guinea-Bissau
Source: PubMed Central journal article supplement (PMC8176492; doi:10.4269/ajtmh.20-1029), 2021-03-29
Supplement: tpmd201029.SD1.pdf [file tpmd201029.SD1.pdf]

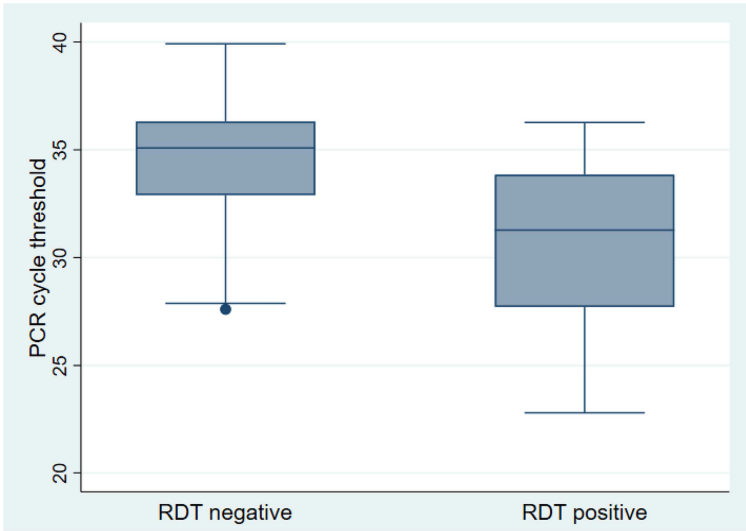

Supplementary Figure 3. QPCR cycle thresholds of *P. falciparum* cases by RDT result

**Supplementary Table 3. Demographic data of households**

| <b>n=58</b>                                          | <b>Value</b> | <b>95% CI</b> |
|------------------------------------------------------|--------------|---------------|
| Mean number of members per household                 | 9.35         | 8.28 - 10.42  |
| Mean number of participants per household            | 8.39         | 6.97 - 9.80   |
| Mean school years for most educated household member | 7.75         | 7.02 - 8.48   |
| Most educated household member (%)                   |              |               |
| Male                                                 | 51.68        | 36.97 – 66.10 |
| Female                                               | 48.31        | 38.89 – 63.02 |
| Mean number of bed nets per person                   | 0.62         | 0.55 – 0.69   |
| Larval source management knowledge score             |              |               |
| 0 correct answers                                    | 66.02        | 52.18 – 77.58 |
| 1 correct answer                                     | 17.63        | 9.43 – 30.54  |
| 2 correct answers                                    | 1.30         | 0.17 – 9.05   |
| 3 correct answers (max score)                        | 15.02        | 7.73 – 27.17  |
| Household residence with open eaves (%)              | 100          | -             |

**Supplementary Table 4. Household factors associated with Plasmodium parasitemia by PCR – multivariate analysis**

| <b>n=58</b>                               | <b>OR</b> | <b>95% CI</b> | <b>p value</b> |
|-------------------------------------------|-----------|---------------|----------------|
| Household education level                 |           |               |                |
| No education                              | -0.94     | -5.64 – 3.77  | 0.696          |
| Primary education (1-6 years)             | 1         | -             |                |
| Secondary education (7-12 years)          | -0.43     | -1.92 – 1.07  | 0.574          |
| Fever in the past 2 weeks (under 5s only) | 1.6       | -1.67 – 4.87  | 0.337          |
| SES                                       |           |               |                |
| 1 (lowest)                                | 2.78      | -0.41 – 5.97  | 0.088          |
| 2                                         | -0.41     | -2.35 – 1.52  | 0.675          |
| 3                                         | 0.37      | -1.33 – 2.09  | 0.665          |
| 4                                         | 2.52      | -0.8 – 5.84   | 0.137          |
| 5                                         | 1         | -             | -              |
| Household LSM score $\geq 3$              | -0.99     | -3.24 – 1.24  | 0.383          |
| Household with $\geq 1$ net per 2 persons | 0.24      | -1.5 – 1.98   | 0.787          |

**Supplementary Table 5. Female participants**

| <b>n=238</b>                          | <b>Value</b> | <b>p value</b> |
|---------------------------------------|--------------|----------------|
| Education level compared to males (%) |              |                |
| 0 years                               | 60.5         | 0.2            |
| In primary education                  | 63.2         | 0.9            |
| In secondary education                | 47.9         | 3.6            |
| In higher education                   | 0            | 1.4            |
|                                       |              | <b>95% CI</b>  |
| Pregnancy (as % of 15-49 year olds)   |              |                |
| Pregnant                              | 3.13         | 1.25 – 7.63    |
| Pregnant in past 2 years              | 28.53        | 21.37 – 36.97  |
| ITPP received in last pregnancy       |              |                |
| No ITPP received (%)                  | 31.61        | 15.53 – 53.73  |
| 1-2 ITPP dose (%)                     | 0            | -              |
| ≥3 ITPP doses (%)                     | 68.39        | 46.26 – 84.46  |

**Supplementary Table 6. Population estimates of anemia**

|                                         | <b>Mean</b> | <b>95% CI</b> |
|-----------------------------------------|-------------|---------------|
| Mean Hemoglobin level (g/dl)            | 110.6       | 108.3 – 112.8 |
| <b>Adults, children and adolescents</b> |             |               |
| Normal                                  | 25.75       | 21.15 – 30.96 |
| Mild anemia                             | 33.26       | 28.05 – 38.90 |
| Moderate anemia                         | 37.58       | 31.06 – 44.58 |
| Severe anemia                           | 3.39        | 1.93 – 5.91   |
| <b>Adults</b>                           |             |               |
| Women                                   |             |               |
| Normal                                  | 26.60       | 18.79 – 36.22 |
| Mild                                    | 34.55       | 26.38 – 43.75 |
| Moderate                                | 34.63       | 25.67 – 44.83 |
| Severe                                  | 4.19        | 1.57 – 10.68  |
| Men                                     |             |               |
| Normal                                  | 38.76       | 28.45 – 50.2  |
| Mild                                    | 49.06       | 36.75 – 61.47 |
| Moderate                                | 10.06       | 5.09 – 18.91  |
| Severe                                  | 2.10        | 0.047 – 8.93  |
| <b>Children and adolescents</b>         |             |               |
| Children 1-5 years old                  |             |               |
| Normal                                  | 20.11       | 12.80 – 30.16 |
| Mild                                    | 33.38       | 20.61 – 49.15 |
| Moderate                                | 42.93       | 29.82 – 57.12 |
| Severe                                  | 3.56        | 1.12 – 10.74  |
| Children 6-11 years old                 |             |               |
| Normal                                  | 15.02       | 8.74 – 24.60  |
| Mild                                    | 15.19       | 8.56 – 25.52  |
| Moderate                                | 65.33       | 51.56 – 76.94 |
| Severe                                  | 4.44        | 1.86 – 10.21  |
| Children 12-14 years old                |             |               |
| Normal                                  | 24.75       | 9.62 – 50.41  |
| Mild                                    | 29.92       | 13.67 – 53.52 |
| Moderate                                | 45.31       | 23.96 – 68.54 |
| Severe                                  | 0           | -             |
